# Supplementary material for: High expression of ESRP1 regulated by circ-0005585 promotes cell colonization in ovarian cancer
Source: PubMed Central journal article supplement (PMC7236301; doi:10.1186/s12935-020-01254-3), 2020-05-19
Supplement: 12935_2020_1254_MOESM1_ESM.pdf [file 12935_2020_1254_MOESM1_ESM.pdf]

**a** CTCGAGGGGCCCCAGCAGTTAGAATCCTCAGAAAAGAAGTGTGGTAAAGATGTATGGTGTATCTTGAAACCTCCAGACACAAGAAAACCTTCTAGCAAATTC  
 AGGGGAAGTTTGTCTACACTCAGGCTGCAGTATTTTCAGCAAACCTTGATTGGACAAACGGGCCTGTGCCTTATCTTTTGGTGGAGTGAAAAATTTGAGCTA  
 GTGAAGCCAAATCGTAACTTACAGCAAGCAGCATGCAGCATACTGGCTCTTTGCTGATTGCAAATAGGCATTTAAAATGTGAATTTGGAATCAGATGTCTCCA  
 TACTTCCAGTTAAAGTGGCATCATAGGTGTTTCCTAAGTTTTAAGTCTTGGATAAAAACCTCCACCAGTGTCTACCATCTCCACCATGAACCTCTGTTAAGGAAG  
 CTTCATTTTTGTATATCCCGCTCTTTTCTCTTCATTTCCCTGTCTTCTGCATAATCATGCCTTCTTGTAAAGTAATTAAGCATAAGATCTTGAATAATAAAATC  
 ACAATCTTAGGAGAAAGAATAAAATTTGTTATTTCCAGTCTCTTGGCCATGATGATATCTTATGATTAATAAACAATTAATTTTAAAACACCTGAAGATAAATTA  
 GAAGAAATTTGCACCCTCCACAAAACATACAAAAGTTTAAAAGTTTGGATCTTTTTCTCAGCAGGTATCAGTTGTAATAATGAATTAGGGGCCAAAATGCAAA  
 ACGAAAAATGAAGCAGCTACATGTAGTTAGTAATTTGAACTGTAATTTGAGTCTTCAATTTGCTTATTTTATTTTATTTTACTTTTTTCTTTTCTTTTCTTTGAT  
 GGTTTGGACTTTAATAAGAGAAATTCATAGTTTTTAATATCCAGAAAGTGAGACAATTTGAACAGTGTATTCTAGAAAACAATACACTAATGAACAGAAAGTGA  
 ATGCTTATATATATTATGATAGCCTTAAACCTTTTTCTCTAATGCCTTAACTGTCAAATAATTATAACCTTTTTAAAGCATAGGACTATAGTCAGCATGCTAGACTGA  
 GAGTAAACACTGATGCAATTAGAACAGGACTGATGCTGTGAGTGTAAACACTATGTTTAGCTGTGTTTATGCTATAAAAAGTGAATATTAGACACTAGCTAG  
 TACTGCTGCCTCATGTAACCTCAAAGAAAACAGGATTTTATTAGTGCATTGAATGTGGATTTTCTCTAAGTTACTCATATTGCTCTTTGCTTGAATGCAATGC  
 CGTGCAGATTTATGAGGCTGCTATTTTTATTTTCTGTGCATTACTTTAACACCTTAAAGGGAGAAGCAAACATTTCTTCTCAGCTGACTGGCAATGGCCCTTT  
 AACTGCAATAGGAAGAAAAAAGGTTTGTGTGAAAATTTGGTATAACTGGCACTTAAAGATCGAAAAGAAAATTTCTGTATACTTGATGCCTTAAAGATGCCC  
 AAAGCTGCCCAAAGCTCTGAAAGACTTTAAGATAGGCAGTAATGCTTACTACAATACTACTGAGTTTTTGTAGAGTTAACATTTGATAATAAAACCTGCTGTTT  
 AATCTCAAGTCGAC

**b** ATGACGGCCTCTCCGGATTACTTGGTGGTGTCTTTTTGGGATCACTGCTGGGGCCACCGGGGCCAAGCTAGGCTCGGATGAGAAGGAGTTGATCCTGCTGT  
 TCTGAAAAGTCTGGATCTGGCCAACAAGAAGGTGGGACAGTTGCACGAAGTGCTAGTTAGACCGGATCAGTTGGAAGTGCAGGAGGACTGCAAAGAAG  
 AAATAAAATAGACGTCGAAAAGCCTGTCTCGGCGTGCAGCTGGACCAAGCCCTCCGACAGTTTAAACCAGTCAGTGAGCAATGAACGAAATTTGGAGTA  
 GGGACTTCTTCTGTCTCTGTACTGATGGGCAGCTTCATGTCAGGCAATCCTGCATCCTGAGGCTTCCAAGAAGATGTACTATTACCTGAATGCTTCTATT  
 CCTTTTTGATCTTCGAAAAGAATTCAAGAAATTTGCCCTGGTTCACCTGATATTGACAACTGGACGTTGCCACAATGACAGAGTATTTAAATTTTGGAGAA  
 GAGTAGTTCAGTCTCTCGATATGGAGCCTCTCAAGTTGAAGATATGGGAATATAATTTAGCAATGATTTTCAAGGCCTTATAATCACAGGTTTTTCAAGATCCAG  
 AGAGAGTGAATTACAAGTTTAAAAGTGAAGTTCAGCAAGATGGAACCTTATTGATGATAACACCGTAGTCAGGGCAGGAGTTTACCATGGCAGTCTTCCAG  
 ATCAAGATATTGCAAGATTTCAAAGGACTCAATATTGCCAAGGGAGGTGCAGCAGCTTTGTCTGAATGCTCAGGGTGAAGGAACGGAGAAGCTCTGGTT  
 AGTTTTGTAAGTGAGGAGCACCGAGACTAGCACTACAGAGGCACAAACATCACATGGGGACCCGGTATATTGAGGTTTACAAGCAACAGGTGAAGATTT  
 CCTTAAATTTGCTGGTGGTACTTCCAATGAGGTAGCCCAGTTTTCTCTCCAAGGAAAATCAAGTCATTGTTCCGCATGCGGGGGCTCCCTTTACGGCCACAG  
 CTGAAGAAGTGGTGGCCTTCTTTGGACAGCATTGCCCTATTACTGGGGGAAAAGGAAGGCATCCTCTTTGTCACCTACCCAGATGGTAGGCCAACAGGGGA  
 CGCTTTTGTCTCTTTGCTGTGAGGAATATGCACAGAATGCGTTGAGGAAGCATAAAGACTTGTGGGTAAGATACTTGAATCTTCCAGGAGCACAGC  
 AGCTGAAGTTCAGCAGGTGCTGAATCGATTCTCCTCGGCCCTCTCATTCCACTTCCAACCCCTCCATTATTCCAGTACTACCTCAGCAATTTGTCCCCC  
 TACAAATGTTAGAGACTGTATACGCTTCGAGGTCTTCCCTATGCAGCCACAATTGAGGACATCCTGGATTTCTGGGGGAGTTCGCCACAGATATTGCTAC  
 TCATGGGGTTCACATGGTTTTGAATCACCAGGGCCGCCATCAGGAGATGCCTTTATCCAGATGAAGTCTGCGGACAGAGCATTATGGCTGCACAGAAGT  
 GTCATAAAAAAATCATGAAGGACAGATATGTTGAAGTCTTTCAGTGTTTCAAGTCTGCGGACAGAGCATTATGGCTGCACAGAAGT  
 ATCCCCACCGCCATGTAAGTTACCATGCCTGTCTCCTCCCTCTACACATTTCCAGCTCCTGCTGCAGTATTCTTACAGAAGCTGCCATTTACCAGCCCTC  
 TGTGATTTTGAATCCACGAGCACTGCAGCCCTCCACAGCGTACTACCCAGCAGGCACTCAGCTCTTTCATGAACTACACAGCGTACTATCCAGCCCCCAG  
 GTTCGCCTAATAGTCTTGGCTACTTCCCTACAGCTGCTAATCTTAGCGGTGTCCCTCCACAGCCTGGCAGCGTGGTCAGAATGCAGGGCCTGGCTACAAT  
 ACTGGAGTTAAGGAAATTTCAACTTCTTCCAAGTTACCAGTATGCAACCGAGGATGGACTTATACACAAAATGACCAGGCCAGGACTTACCCAAAGAA  
 TGGTTTTGTATTTAA

**c** GCAATGAATCGCTCCCTGGCTAATGTGATTCTTGGAGGCTATGGCACCCTTCAACAGCTGGTGGAAAACCCATGGAATTTCTGGCACACATACGGAATC  
 AACCTTGACAATGCAATTGACATGATTCGAGAAGCTAATAGCATTATTATTACACCAGGCTATGGTCTCTGTGCAGCCAAAGCTCAATACCCATTGCTGATTT  
 GGTAAGATGCTCACTGAGCAAGGCAAAAAGTCAGGTTTGAATTCACCCAGTTGCAGGCCGAATGCCTGGTCAGCTTAAATGTGCTGCTGGCTGAGGCT  
 GGTGTGCCATATGACATTGTGTTGAAATGGATGAGATCAACCATGATTTTCCAGATACTGATTTGGTCTTGTAAATGGAGCTAATGACACTGTTAATTCAGC  
 AGCTCAAGAAGATCCCAACTTATTATTGCAGGCATGCCAGTCTTGGAGTCTGGAATCAAAGCAGGTGATTGTTATGAAGAGGTCTTTGGGTGTTGGCTA  
 TGCTGCAGTGGACAATCCAATCTTCTACAAACCTAACACGGCCATGCTTCTAGGTGATGCCAAGAAAACATGTGACGCGCTCCAGGCCAAAAGTTAGAGAAT  
 CCTATCAGAA

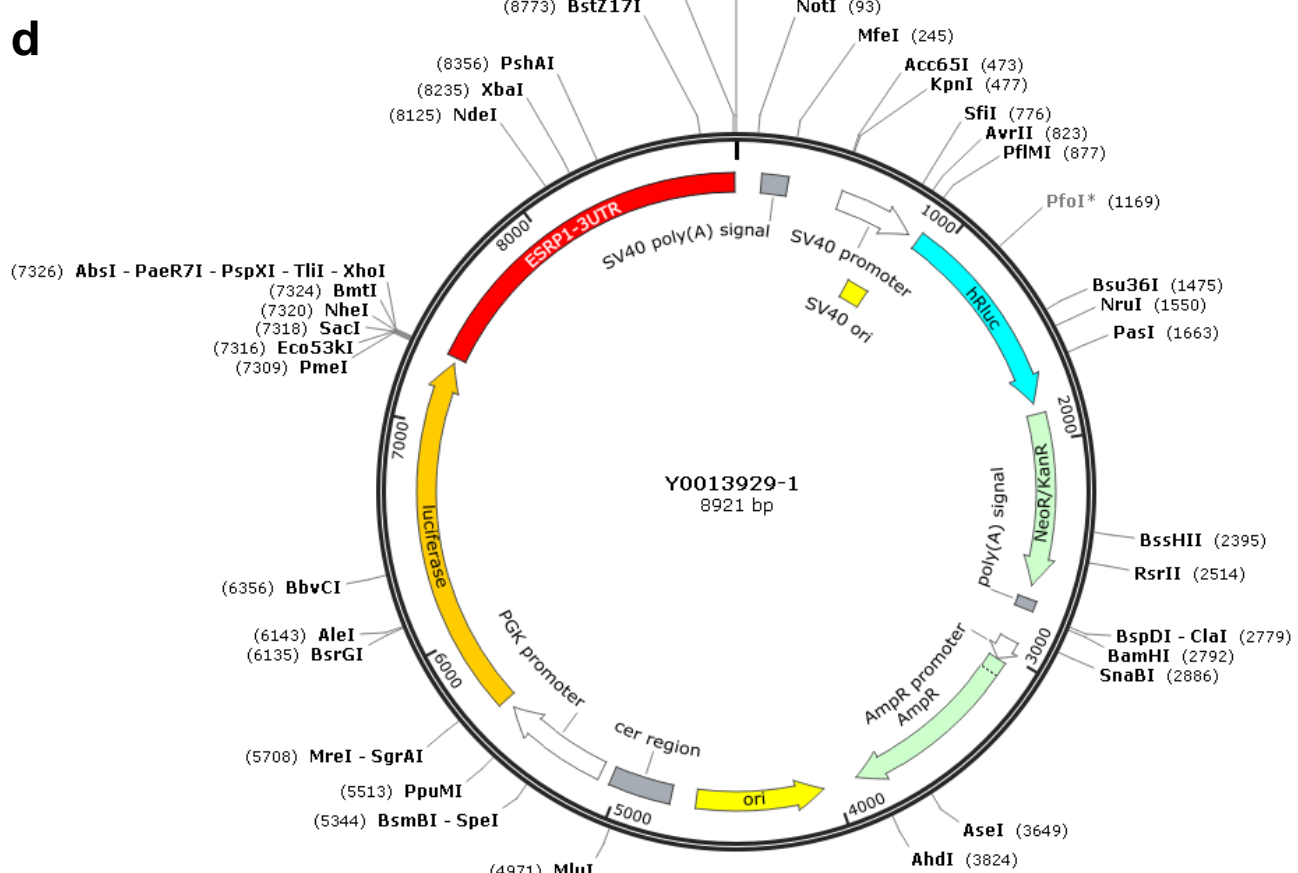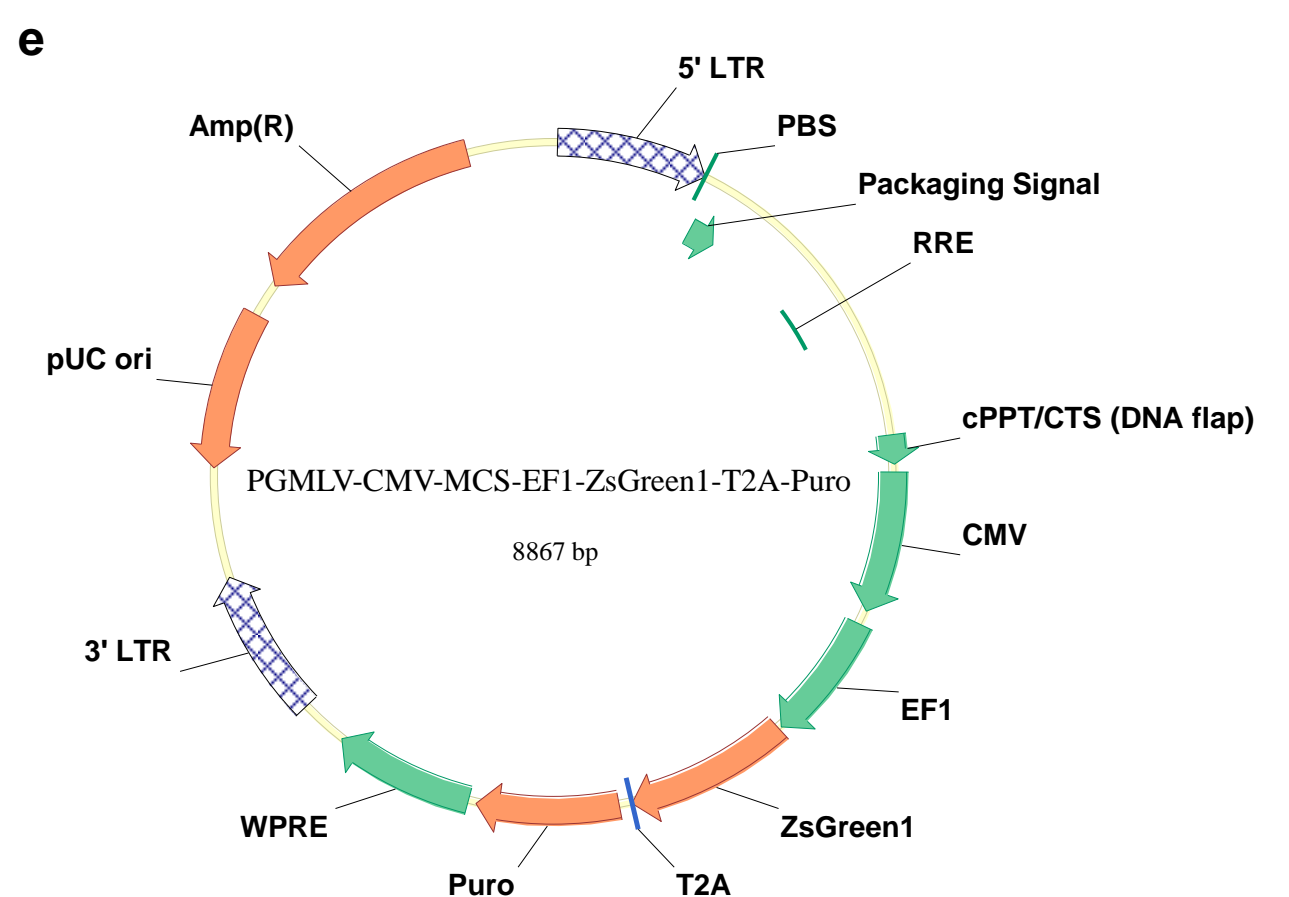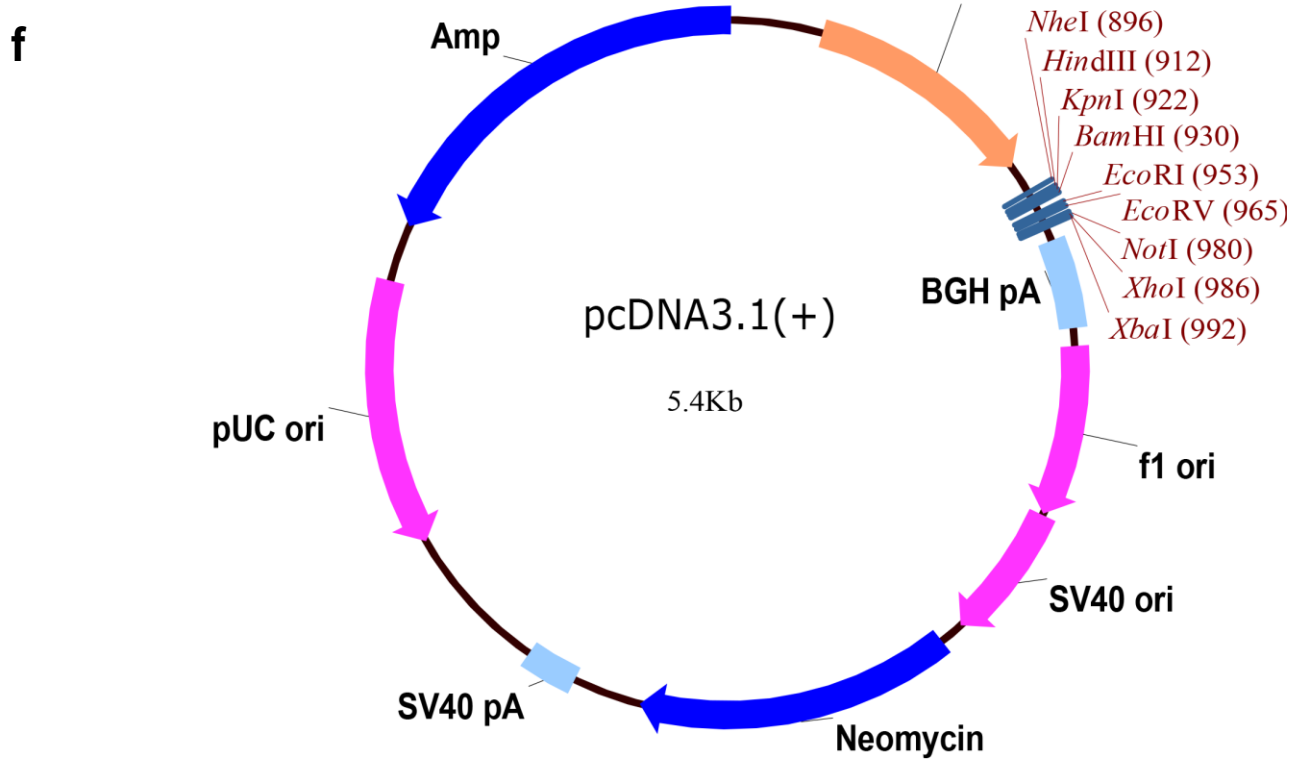

**Additional Figure 3: cDNA sequences and plasmid vectors. a:** ESRP1 3'UTR sequence. **b:** ESRP1 coding region sequence. **c:** hsa\_circ\_0005585 sequence. **d:** Full design of pmirGLO plasmid vectors. **e:** Full design of ESRP1 overexpresses lentiviral vector. **f:** Full design of hsa\_circ\_0005585 overexpression plasmid vector.
