# Supplementary material for: High expression of ESRP1 regulated by circ-0005585 promotes cell colonization in ovarian cancer
Source: PubMed Central journal article supplement (PMC7236301; doi:10.1186/s12935-020-01254-3), 2020-05-19
Supplement: 12935_2020_1254_MOESM3_ESM.pdf [file 12935_2020_1254_MOESM3_ESM.pdf]

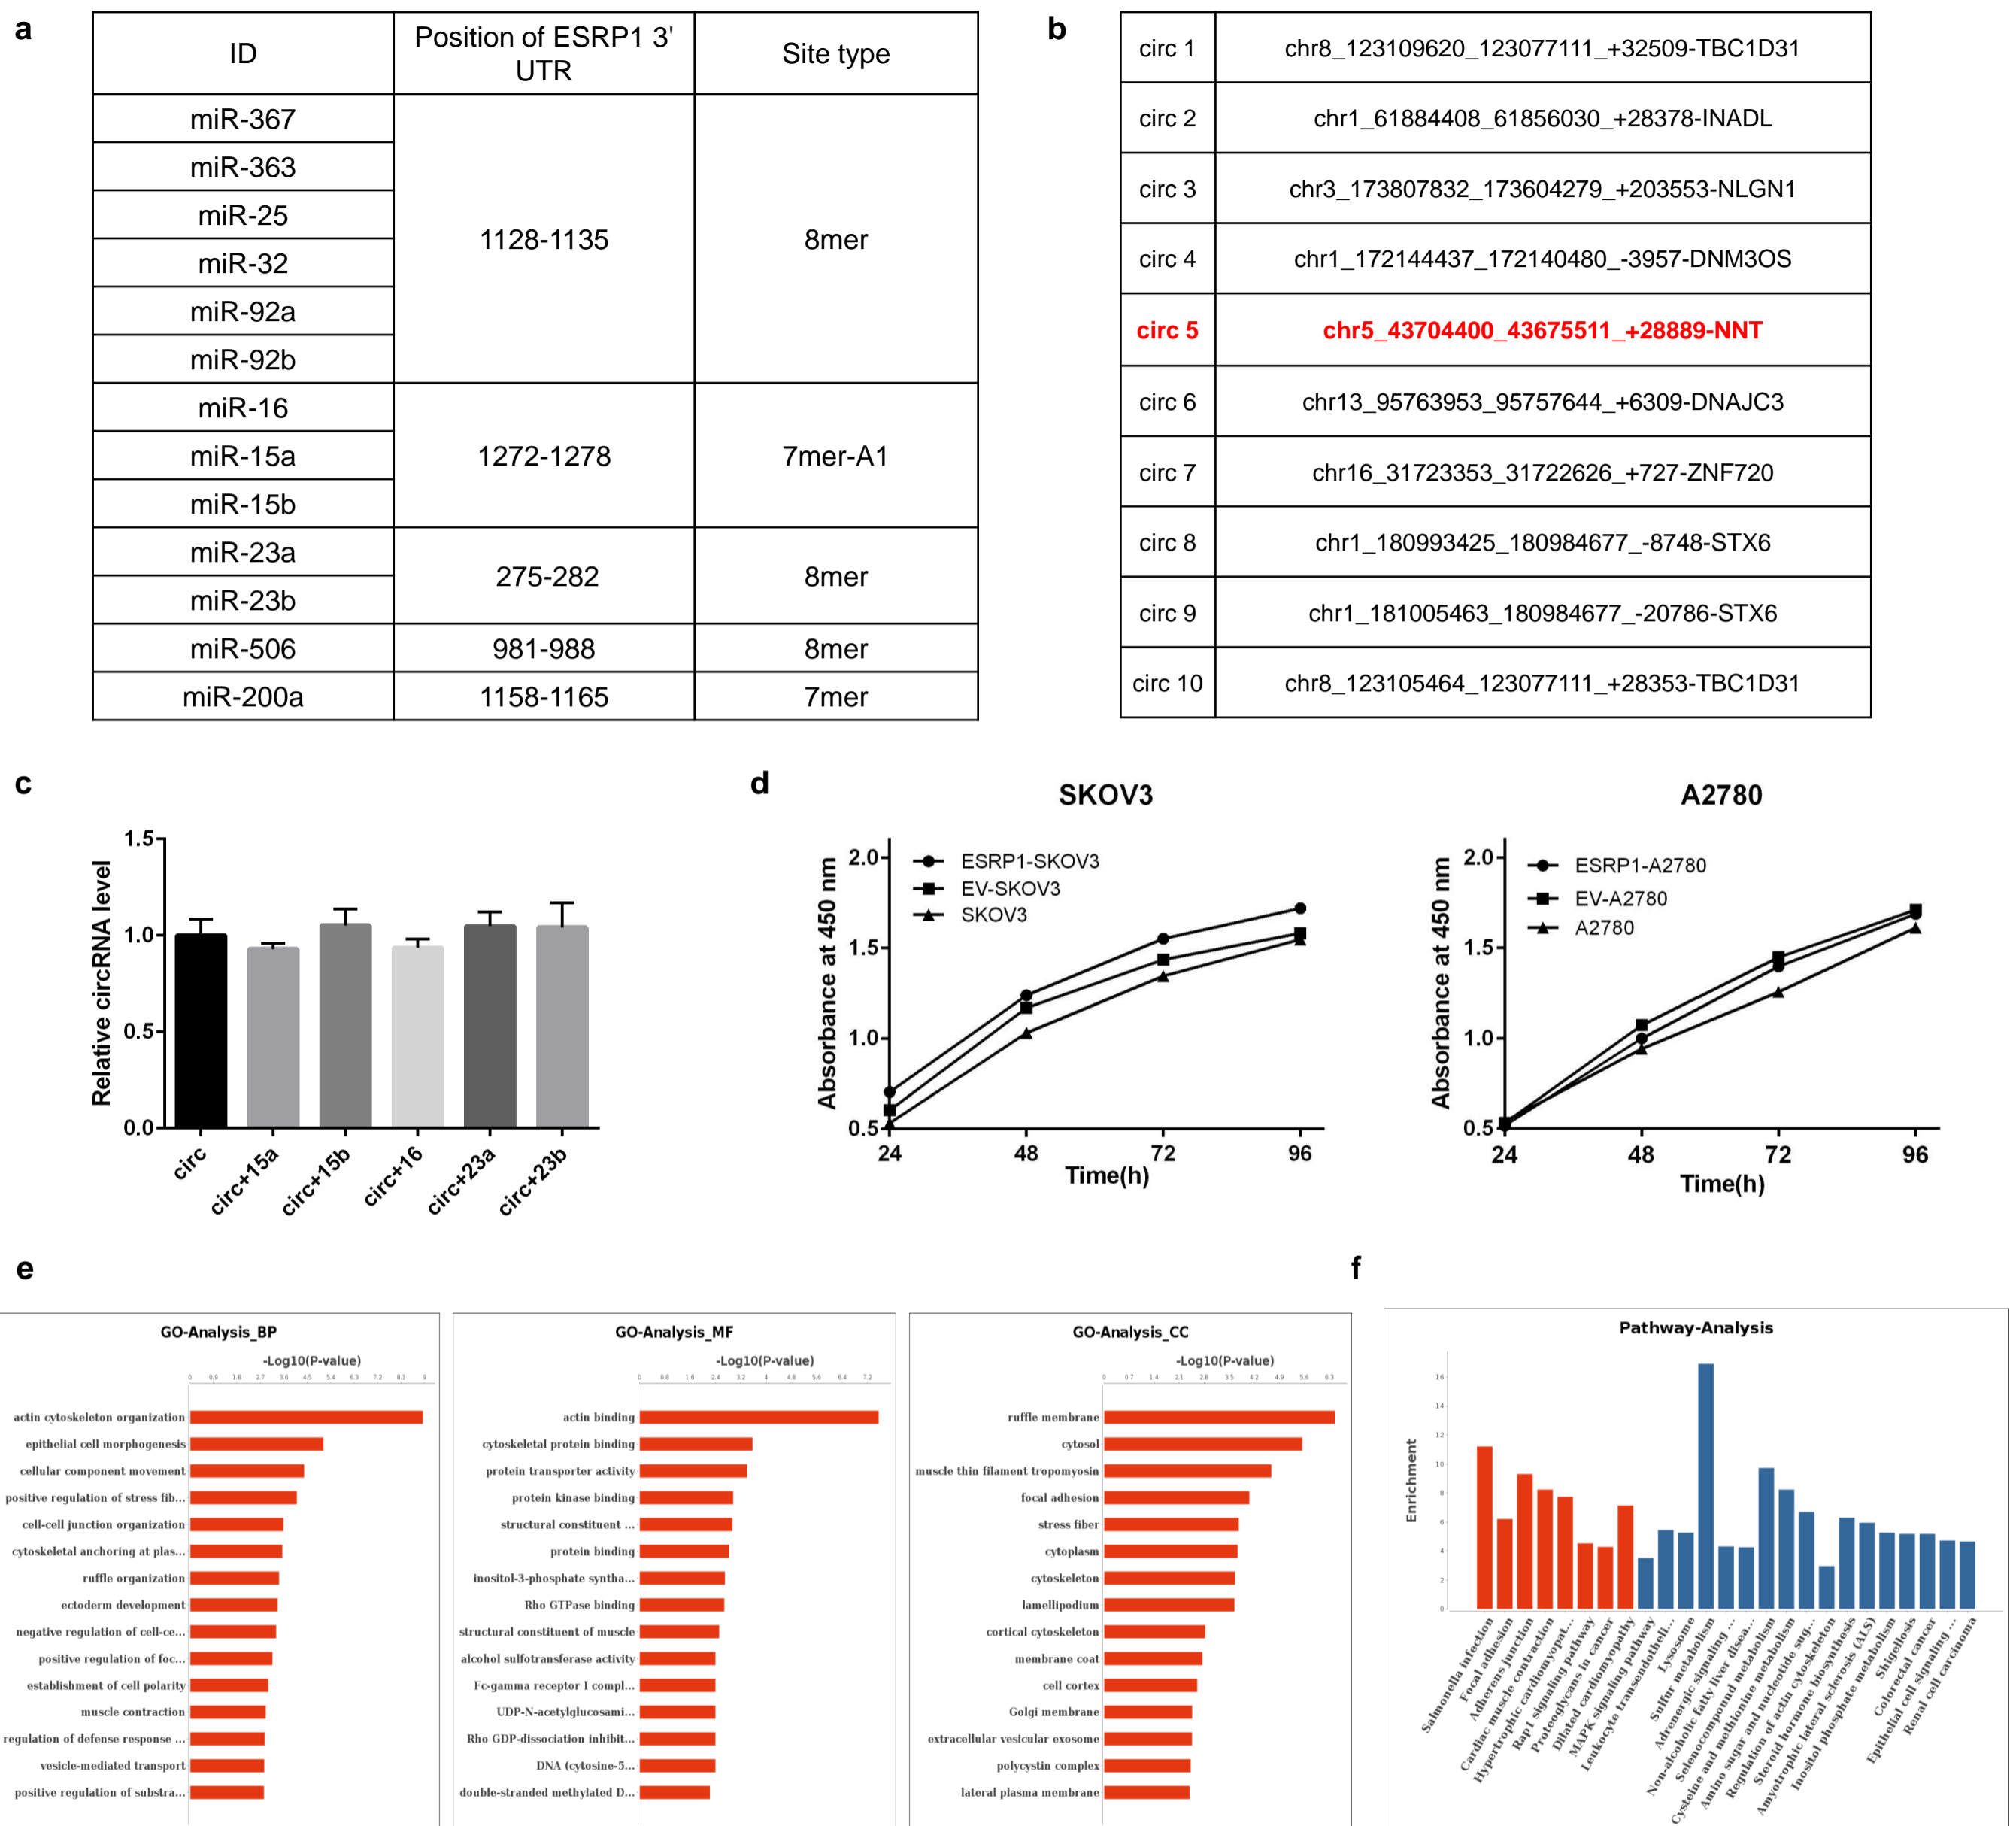

**Additional Figure 1: Non-coding RNA list and ESRP1 bioinformatics functional analysis. a:** MicroRNAs that regulated ESRP1 were predicted by TargetScan and miRnada. 13 of them were selected for validation. **b:** circRNAs abbreviation and RNA-Seq name correspondence table. **c:** Co-transfection of circRNA-0005585 with each microRNA not affected the expression of circRNA-0005585. **d:** Overexpression of ESRP1 not affected cell proliferation in SKOV3 cells and A2780 cells. **e:** ESRP1 alternative splicing differential gene GO analysis. **f:** ESRP1 alternative splicing differential gene KEGG pathway analysis, red indicated  $P < 0.05$ , blue  $P > 0.05$ . \* $P < 0.05$ , \*\* $P < 0.01$ , \*\*\* $P < 0.001$ . Error bars indicate SEM.
