# Supplementary material for: High expression of ESRP1 regulated by circ-0005585 promotes cell colonization in ovarian cancer
Source: PubMed Central journal article supplement (PMC7236301; doi:10.1186/s12935-020-01254-3), 2020-05-19
Supplement: 12935_2020_1254_MOESM4_ESM.pdf [file 12935_2020_1254_MOESM4_ESM.pdf]

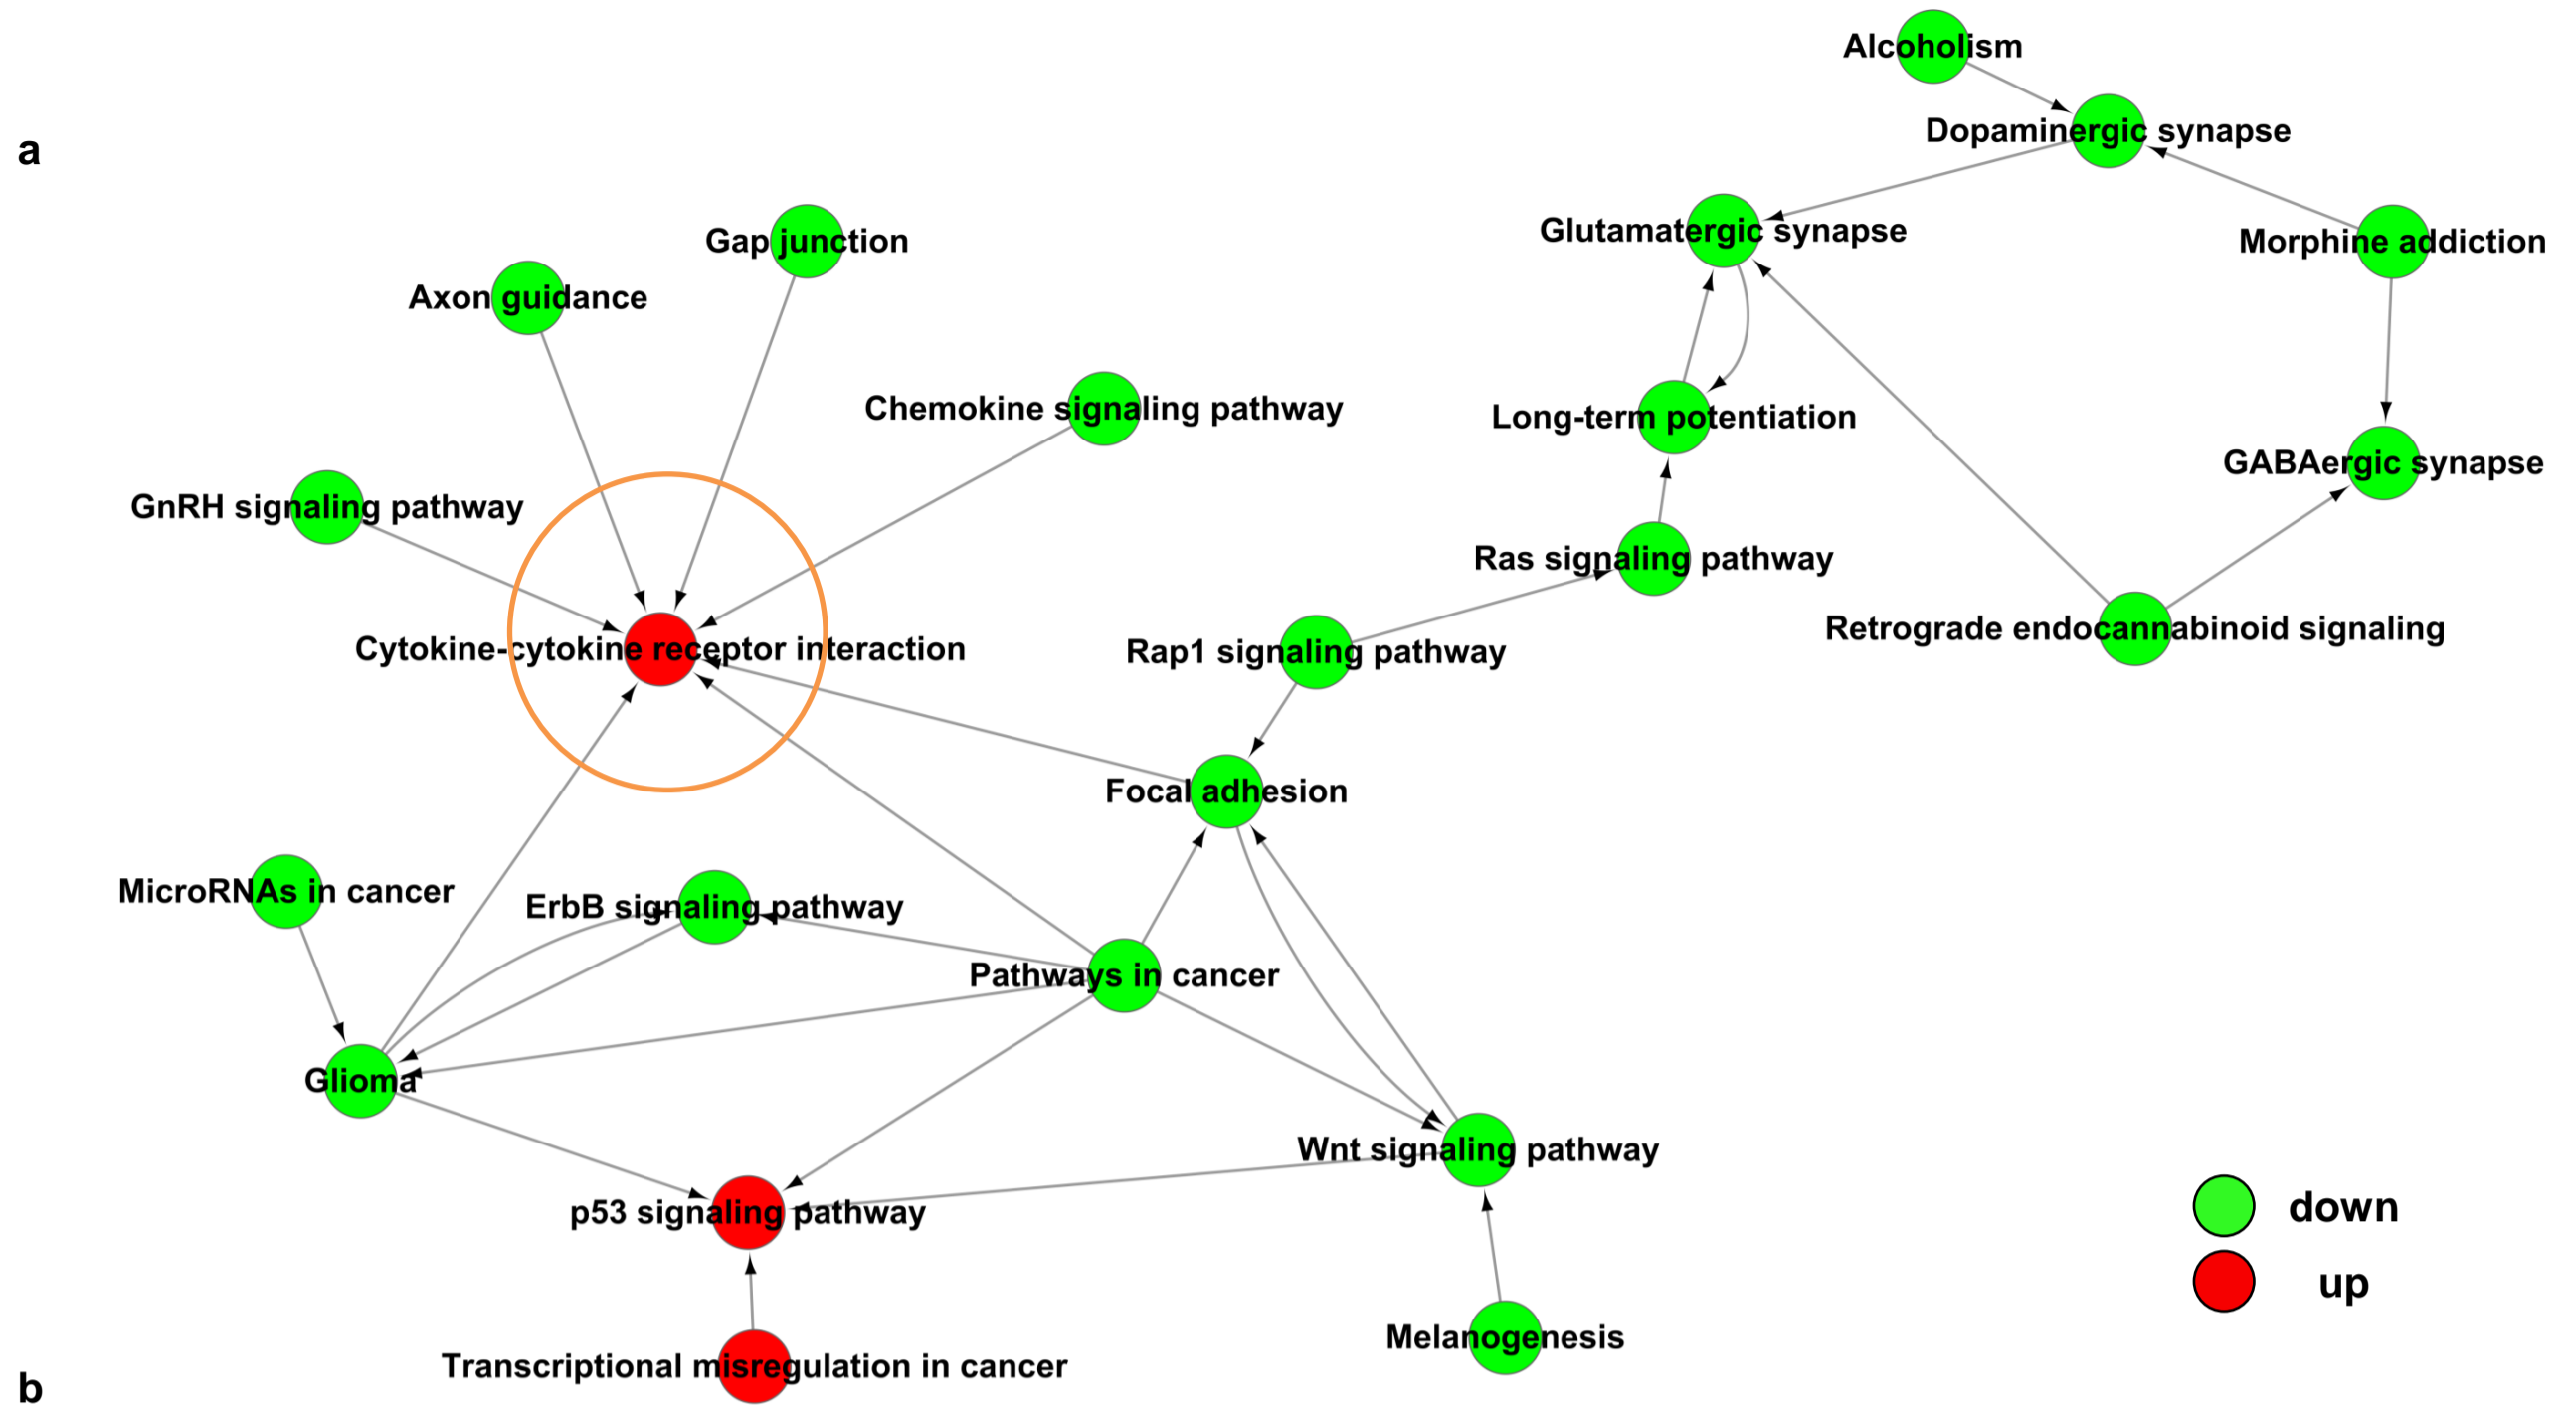

**Additional Figure 3: ESRP1-related pathway. a:** ESRP1 high-throughput sequencing differentially expressed gene-enriched pathways and interrelationships between pathways. **b:** Changes in cytokine-cytokine receptor interaction pathway of ESRP1-SKOV3.
